# Supplementary material
Source: Research Square preprint supplement (doi:10.21203/rs.3.rs-9581547/v1)
Supplement: Supplementary file 1 [file 6949579faf619115720682d7.docx]

**Supplemental Material**

Supplemental Table 1: Seven SASRQ items used in this study, modified from the original Cardeña et al. (2000) instrument by anchoring responses to the period between fetal cardiac evaluation referral and the scheduled appointment. The 6-point Likert response scale (0 = *not experienced* to 5 = *very often experienced*) was preserved.

| **Study item** | **Symptom label** | **Original SASRQ subscale** | **Item wording presented to participants (modified from original SASRQ)** |
| --- | --- | --- | --- |
| Symptom 1 | General anxious feeling | Anxiety / hyperarousal | I felt restless or anxious. |
| Symptom 2 | Difficulty performing tasks | Impairment in functioning | The fetal cardiac evaluation made it difficult for me to perform work or other things I needed to do. |
| Symptom 3 | Avoidance of thinking about the visit | Avoidance | I tried to avoid feelings about the fetal cardiac evaluation. |
| Symptom 4 | Hypervigilance / feeling “on edge” | Anxiety / hyperarousal | I felt hypervigilant or “on edge.” |
| Symptom 5 | Difficulty concentrating | Anxiety / hyperarousal | I had difficulty concentrating. |
| Symptom 6 | Emotional detachment | Dissociation | I felt distant from my own emotions. |
| Symptom 7 | Irritability or anger outbursts | Anxiety / hyperarousal | I felt irritable or had outbursts of anger. |

## Supplemental Table 2. Pre-FCE Survey Structure and Variable Definitions

This table details the variables collected in the pre-evaluation survey, which was administered electronically prior to the fetal cardiac evaluation (FCE). The instrument was based on a modified version of the Stanford Acute Stress Reaction Questionnaire (SASRQ), adapted for use in the prenatal cardiology setting

| Category | Variable / Item | Description |
| --- | --- | --- |
| Demographics | Age | Age in years |
|  | Education level | Less than high school, High school/GED, Some college, College graduate, Graduate degree |
|  | Geographic region | Urban, suburban, or rural residence |
| Medical History | Gravidity / Parity | Number of pregnancies and live births |
|  | Prior pregnancy loss | Yes / No |
|  | Prior anxiety diagnosis | Yes / No |
|  | Prior treatment for anxiety | Yes / No; treatment type specified |
|  | Comorbidities | Any self-reported chronic or acute medical condition |
| Referral Characteristics | Referring provider | OB/GYN, MFM specialist, family medicine physician, midlevel provider, or other |
|  | Time since referral | ≤7 days, 8–14 days, 15–21 days, 22–28 days, 29–35 days, >35 days |
|  | Reason for referral | Suspected ultrasound anomaly, family history of CHD, maternal condition, prior child with CHD, or other |
|  | Visit type | Initial or follow-up FCE |
| Prior Knowledge & Experience | Knowledge of cardiac anatomy | Self-rated on a 6-point Likert scale (None to Very Strong) |
|  | Knowledge of cardiac defects | Self-rated on a 6-point Likert scale (None to Very Strong) |
|  | Prior personal/family FCE experience | Yes / No |
| Anxiety | Symptom 1: General anxious feeling | Likert scale (1 = Not at all to 6 = Extremely) |
|  | Symptom 2: Difficulty performing tasks | As above |
|  | Symptom 3: Avoidance of thinking about the visit | As above |
|  | Symptom 4: Hypervigilance/feeling "on edge" | As above |
|  | Symptom 5: Difficulty concentrating | As above |
|  | Symptom 6: Emotional detachment | As above |
|  | Symptom 7: Irritability or anger outbursts | As above |

## Supplemental Table 3. Post-FCE Survey Structure and Variable Definitions

This table outlines the variables collected immediately following the FCE consultation. The anxiety scale was repeated to allow for pre-post comparisons. Additional items assessed participants’ perceptions of the evaluation experience.

| Category | Variable / Item | Description |
| --- | --- | --- |
| Anxiety Assessment | Symptom 1–7 | Identical items to pre-FCE survey, using the same Likert scale |
| Evaluation Experience | Cardiac abnormality detected | Participant-reported: Detected, Not detected, or Uncertain |
|  | Type of abnormality (if applicable) | Open-ended response if a diagnosis was given |
|  | Provider conducting FCE | Attending physician, Fellow, Resident |
|  | Duration of consultation | Participant-reported in minutes |
|  | Perception of information provided | Subjective perception of the clarity, completeness, and emotional tone of information received |

## Supplemental Table 4. Follow-Up Survey Structure and Variable Definitions

This table outlines the content of the optional follow-up survey distributed electronically 2–3 weeks after the FCE. The survey aimed to assess persistent anxiety, emotional processing, and recall of the evaluation experience. Due to a 23.4% response rate (n=30), these data were retained for exploratory purposes only.

| Category | Variable / Item | Description |
| --- | --- | --- |
| Anxiety Assessment | Symptom 1–7 | Identical to pre- and post-FCE surveys, using a 6-point Likert scale (1 = Not at all to 6 = Extremely) |
| Emotional Recall | Memory of consultation content | Participant's subjective recall of what was communicated during the visit |
|  | Emotional clarity post-evaluation | Perception of how emotionally clear or resolved they felt after the visit |
|  | Persistence of distress | Whether stress/anxiety symptoms continued, worsened, or resolved since the visit |
|  | Information seeking | Whether participants sought additional information (online, provider, peer) after the FCE |
|  | Perceived need for additional support | Participant-perceived need for further psychological, medical, or informational support |
|  | Satisfaction with care | Overall satisfaction with the fetal cardiology consultation |
|  | Open-ended feedback | Optional space for participants to share any additional thoughts or feedback |
